# Supplementary material
Source: PubMed Central journal article supplement (PMC8090874)
Supplement: AEM.01922-20-s0001.pdf [file AEM.01922-20-s0001.pdf]

**Table S1. ANOVA analysis of deviance indicated that longitude, water classification, and nearby fecal matter had significant effects when added individually to the logistic regression model\***

| <b>Landscape Characteristic<sup>†</sup></b> | <b>Df</b> | <b>Residual Df</b> | <b>Deviance</b> | <b>Residual Deviance</b> | <b>P-value<sup>‡</sup></b> |
|---------------------------------------------|-----------|--------------------|-----------------|--------------------------|----------------------------|
| NULL                                        |           | 100                |                 | 137.14                   |                            |
| Latitude                                    | 1         | 99                 | 3.55            | 133.59                   | 0.06                       |
| <b>Longitude</b>                            | <b>1</b>  | <b>98</b>          | <b>5.55</b>     | <b>128.04</b>            | <b>0.02</b>                |
| Elevation (m)                               | 1         | 97                 | 0.19            | 127.85                   | 0.66                       |
| Site Classification                         | 3         | 94                 | 5.19            | 122.66                   | 0.16                       |
| Groundcover                                 | 5         | 89                 | 4.92            | 117.74                   | 0.43                       |
| Canopy Classification                       | 2         | 87                 | 0.90            | 116.84                   | 0.64                       |
| Distance to Water                           | 3         | 84                 | 3.48            | 113.36                   | 0.32                       |
| <b>Water Classification</b>                 | <b>5</b>  | <b>79</b>          | <b>13.28</b>    | <b>100.08</b>            | <b>0.02</b>                |
| Landform                                    | 5         | 74                 | 10.51           | 89.57                    | 0.06                       |
| <b>Nearby Fecal Matter</b>                  | <b>1</b>  | <b>73</b>          | <b>5.09</b>     | <b>84.48</b>             | <b>0.02</b>                |
| Rotting Wood Present                        | 1         | 72                 | 0.01            | 84.47                    | 0.91                       |
| Sample Type                                 | 4         | 68                 | 1.33            | 83.14                    | 0.86                       |
| Soil pH                                     | 1         | 67                 | 0.03            | 83.11                    | 0.85                       |

\* No p-values were <0.05 when all landscape characteristics were analyzed simultaneously

<sup>†</sup> Landscape characteristics were added sequentially from top to bottom of the table

<sup>‡</sup> p-values <0.05 are indicated in bold

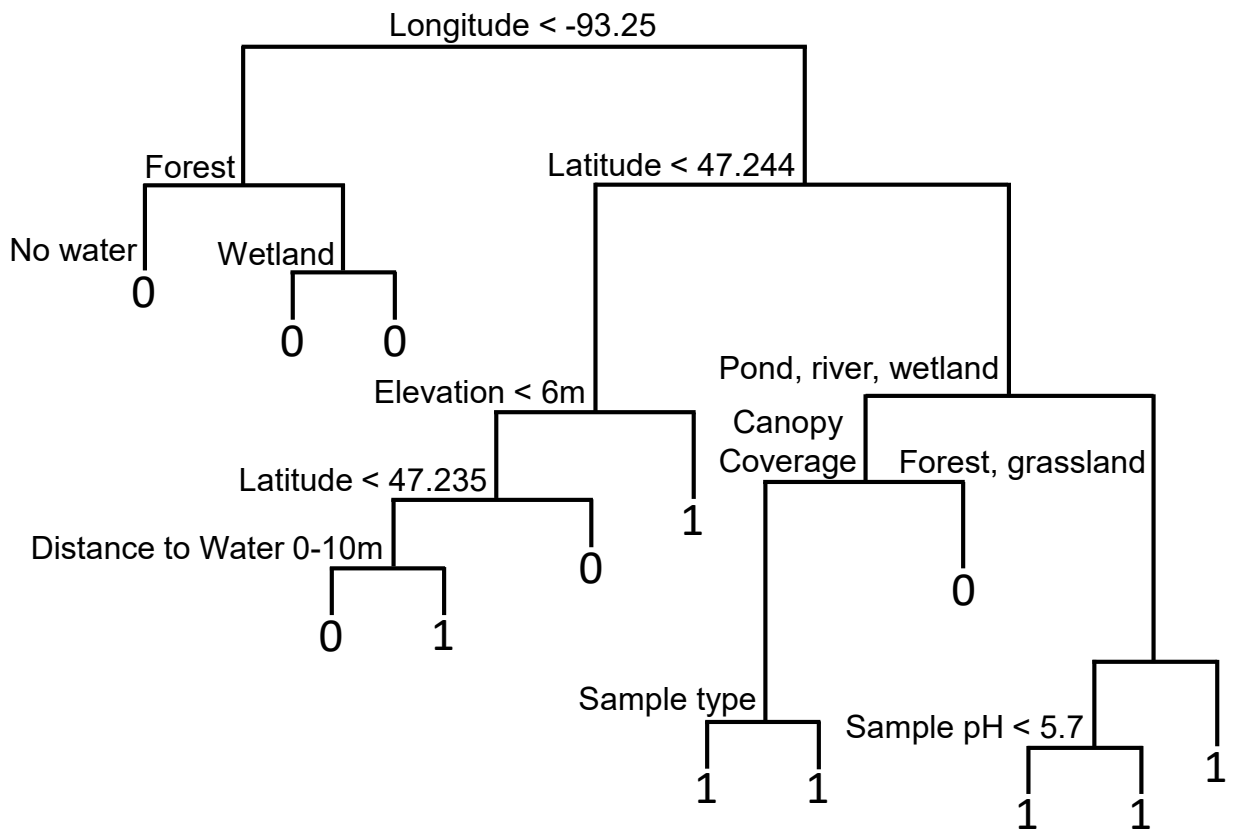

**Supplemental Figure 1. Classification Tree with 14 nodes.**  
 The tree nodes describe factors that predict *B. dermatitidis* DNA presence or absence.
